# Supplementary material for: Tick borne relapsing fever - a systematic review and analysis of the literature
Source: PubMed Central journal article supplement (PMC8887751; doi:10.1371/journal.pntd.0010212), 2022-02-16
Supplement: pntd.0010212.s004.pdf [file pntd.0010212.s004.pdf]

## Tick borne relapsing fever – a systematic review and analysis of the literature

S1 Table

**Data extraction sheet.**

| Screening and Selecting Tool – Data extraction Sheet |          |                                                                                       |                 |
|------------------------------------------------------|----------|---------------------------------------------------------------------------------------|-----------------|
| <b>Reviewer name:</b>                                |          |                                                                                       | <b>Date:</b>    |
| <b>Author name/study ID/country:</b>                 |          |                                                                                       | <b>Year:</b>    |
| <b>Title:</b>                                        |          |                                                                                       | <b>Journal:</b> |
| <b>Studies excluded because:</b>                     |          |                                                                                       |                 |
| Not about TBRF<br>(other disease)                    | Language | No relevant information<br>(epidemiological, clinical or<br>diagnostical information) | other           |
| <b>Case report:</b>                                  |          |                                                                                       |                 |
| <b>Case series:</b>                                  |          |                                                                                       |                 |
| <b>Cohort study:</b>                                 |          |                                                                                       |                 |
| <b>Randomized controlled trial:</b>                  |          |                                                                                       |                 |
| <b>Epidemiological study:</b>                        |          |                                                                                       |                 |
| <b>Non-randomized controlled trial:</b>              |          |                                                                                       |                 |
| <b>Other:</b>                                        |          |                                                                                       |                 |
| <b>Study period:</b>                                 |          |                                                                                       |                 |
| <b>Number of diagnosed patients for TBRF:</b>        |          |                                                                                       |                 |
| <b>Gender:</b>                                       |          |                                                                                       |                 |
| <b>Median age:</b>                                   |          |                                                                                       |                 |
| <b>Age range:</b>                                    |          |                                                                                       |                 |
| <b>Country of diagnosis:</b>                         |          |                                                                                       |                 |
| <b>Country of manifestation:</b>                     |          |                                                                                       |                 |
| <b>Laboratory confirmed A (molecular):</b>           |          |                                                                                       |                 |
| <b>Laboratory confirmed B (microscopy):</b>          |          |                                                                                       |                 |
| <b>Laboratory suspected B (culture):</b>             |          |                                                                                       |                 |
| <b>Laboratory suspected B (animal inoculation):</b>  |          |                                                                                       |                 |
| <b>Laboratory suspected C (serology):</b>            |          |                                                                                       |                 |
| <b>Vectors:</b>                                      |          |                                                                                       |                 |
| <b>Tick species:</b>                                 |          |                                                                                       |                 |
| <b><i>Borrelia</i>:</b>                              |          |                                                                                       |                 |
| <b>Fever relapses in absolute number (n):</b>        |          |                                                                                       |                 |
| <b>Ticks infected with <i>Borrelia</i> (%):</b>      |          |                                                                                       |                 |
| <b>Vectors infested with ticks (%):</b>              |          |                                                                                       |                 |
| <b>Major laboratory abnormalities:</b>               |          |                                                                                       |                 |
| <b>Name of Hospital where treated:</b>               |          |                                                                                       |                 |
| <b>Number of patients treated:</b>                   |          |                                                                                       |                 |
| <b>Number of patients untreated:</b>                 |          |                                                                                       |                 |
| <b>Treatment regimens (drugs, dosage, duration):</b> |          |                                                                                       |                 |

|  |                                               |
|--|-----------------------------------------------|
|  |                                               |
|  | <b>Therapy outcome:</b>                       |
|  | <b>Frequency of JHR (absolute number):</b>    |
|  | <b>Frequency of JHR (%):</b>                  |
|  | <b>Complications:</b>                         |
|  | <b>Concomitant pregnancy:</b>                 |
|  | <b>Mortality treated (absolute number):</b>   |
|  | <b>Mortality treated (%):</b>                 |
|  | <b>Mortality untreated (absolute number):</b> |
|  | <b>Mortality untreated (%):</b>               |
|  | <b>Cause of death:</b>                        |
|  | <b>Co-infections:</b>                         |
|  | <b>Interesting points/quotes/conclusions:</b> |
|  | <b>Comments/Other:</b>                        |

JHR, Jarisch-Herxheimer reaction; TBRF, tick borne relapsing fever.
