# Supplementary material for: Tick borne relapsing fever - a systematic review and analysis of the literature
Source: PubMed Central journal article supplement (PMC8887751; doi:10.1371/journal.pntd.0010212), 2022-02-16
Supplement: pntd.0010212.s005.pdf [file pntd.0010212.s005.pdf]

## Tick borne relapsing fever – a systematic review and analysis of the literature

S2 Table

**TBRF treatment details: antimicrobial treatment regimen, dosage and duration.**

| Antimicrobial treatment regimen  | Reported in number of studies (n) | Daily dosage                                                                   | Duration (days) |
|----------------------------------|-----------------------------------|--------------------------------------------------------------------------------|-----------------|
| <b>Doxycycline</b>               | 85                                | 100-400 mg i.v./p.o.                                                           | 5-21            |
| <b>Penicillin</b>                | 41                                | 1,000-3,000 mg p.o.;<br>300,000-4,000,000 U i.m.;<br>300,000-18,000,000 U i.v. | 5-14            |
| <b>Tetracycline</b>              | 37                                | 500-2,000 mg i.v./p.o.                                                         | 1-15            |
| <b>Ceftriaxone</b>               | 28                                | 1,000-2,000 mg i.v.                                                            | 5-30            |
| <b>Erythromycin</b>              | 16                                | 750-2,000 mg i.v./p.o.                                                         | 5-14            |
| <b>Arsenicals</b>                | 12                                | unclear                                                                        | unclear         |
| <b>Ciprofloxacin</b>             | 5                                 | unclear                                                                        | unclear         |
| <b>Azithromycin</b>              | 3                                 | unclear                                                                        | unclear         |
| <b>Cefuroxime</b>                | 2                                 | unclear                                                                        | unclear         |
| <b>Gentamicin and penicillin</b> | 2                                 | unclear                                                                        | unclear         |
| <b>Levofloxacin</b>              | 2                                 | unclear                                                                        | unclear         |
| <b>Minocycline</b>               | 2                                 | unclear                                                                        | unclear         |
| <b>Bismuth iodide</b>            | 1                                 | unclear                                                                        | unclear         |
| <b>Cefotaxime</b>                | 1                                 | unclear                                                                        | unclear         |
| <b>Ceftizoxime</b>               | 1                                 | unclear                                                                        | unclear         |
| <b>Ertapenem</b>                 | 1                                 | unclear                                                                        | unclear         |
| <b>Gatifloxacin</b>              | 1                                 | unclear                                                                        | unclear         |
| <b>Metronidazole</b>             | 1                                 | unclear                                                                        | unclear         |
| <b>Piperacillin/tazobactam</b>   | 1                                 | unclear                                                                        | unclear         |
| <b>Streptomycin</b>              | 1                                 | unclear                                                                        | unclear         |
| <b>Tobramycin</b>                | 1                                 | unclear                                                                        | unclear         |
| <b>Vancomycin</b>                | 1                                 | unclear                                                                        | unclear         |

i.v., intravenous; p.o., per os; i.m., intramuscular.
