# Supplementary material for: Tick borne relapsing fever - a systematic review and analysis of the literature
Source: PubMed Central journal article supplement (PMC8887751; doi:10.1371/journal.pntd.0010212), 2022-02-16
Supplement: pntd.0010212.s009.pdf [file pntd.0010212.s009.pdf]

# Tick borne relapsing fever – a systematic review and analysis of the literature

S1 Fig

Supporting maps: distribution of competent vector ticks for TBRF *Borrelia* spp.

**S1A Fig** Distribution of competent vector ticks for tick borne relapsing fever (TBRF) *Borrelia* in America.

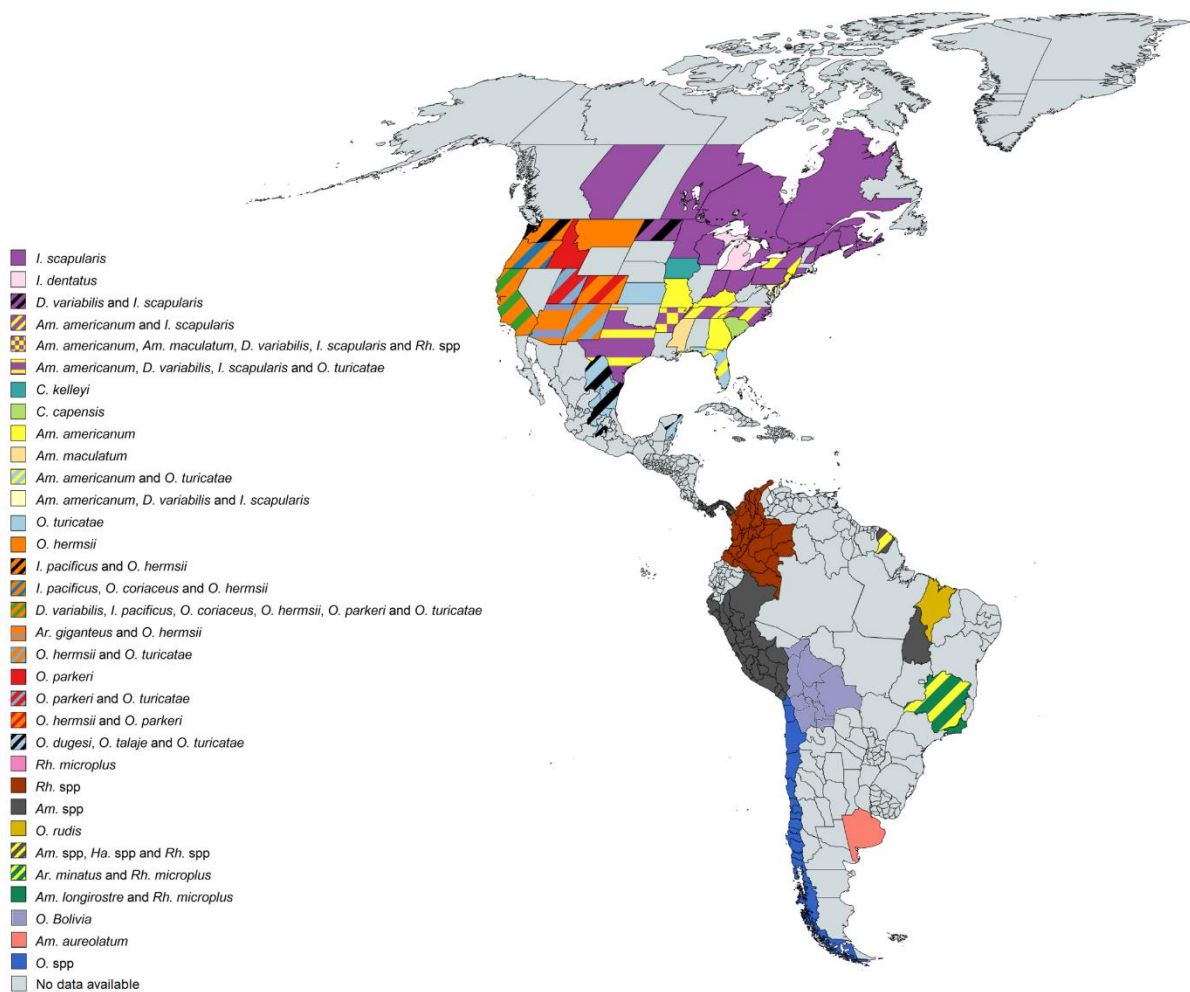

Am., *Amblyomma*; Ar., *Argas*; C., *Carios*; D., *Dermacentor*; Ha, *Haemaphysalis*; I., *Ixodes*; O., *Ornithodoros*; Rh., *Rhipicephalus*; sp., species (singular); spp., species (plural).

Map created on [www.mapchart.net](http://www.mapchart.net).

S1B Fig

Distribution of competent vector ticks for TBRF *Borrelia* in Africa.

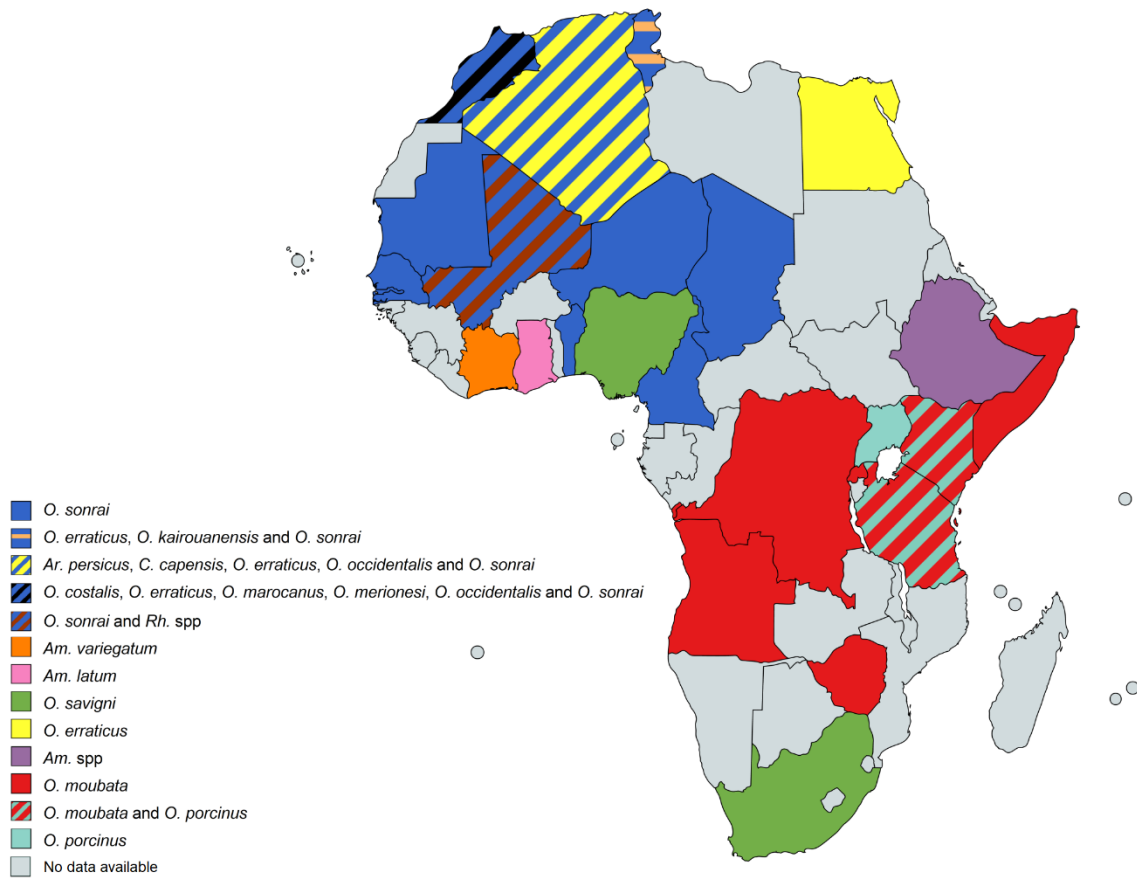

Am., *Amblyomma*; Ar., *Argas*; C., *Carios*; O., *Ornithodoros*; Rh. *Rhipicephalus*; spp., species (plural).

Map created on [www.mapchart.net](http://www.mapchart.net).

S1C Fig

Distribution of competent vector ticks for TBRF *Borrelia* in Europe.

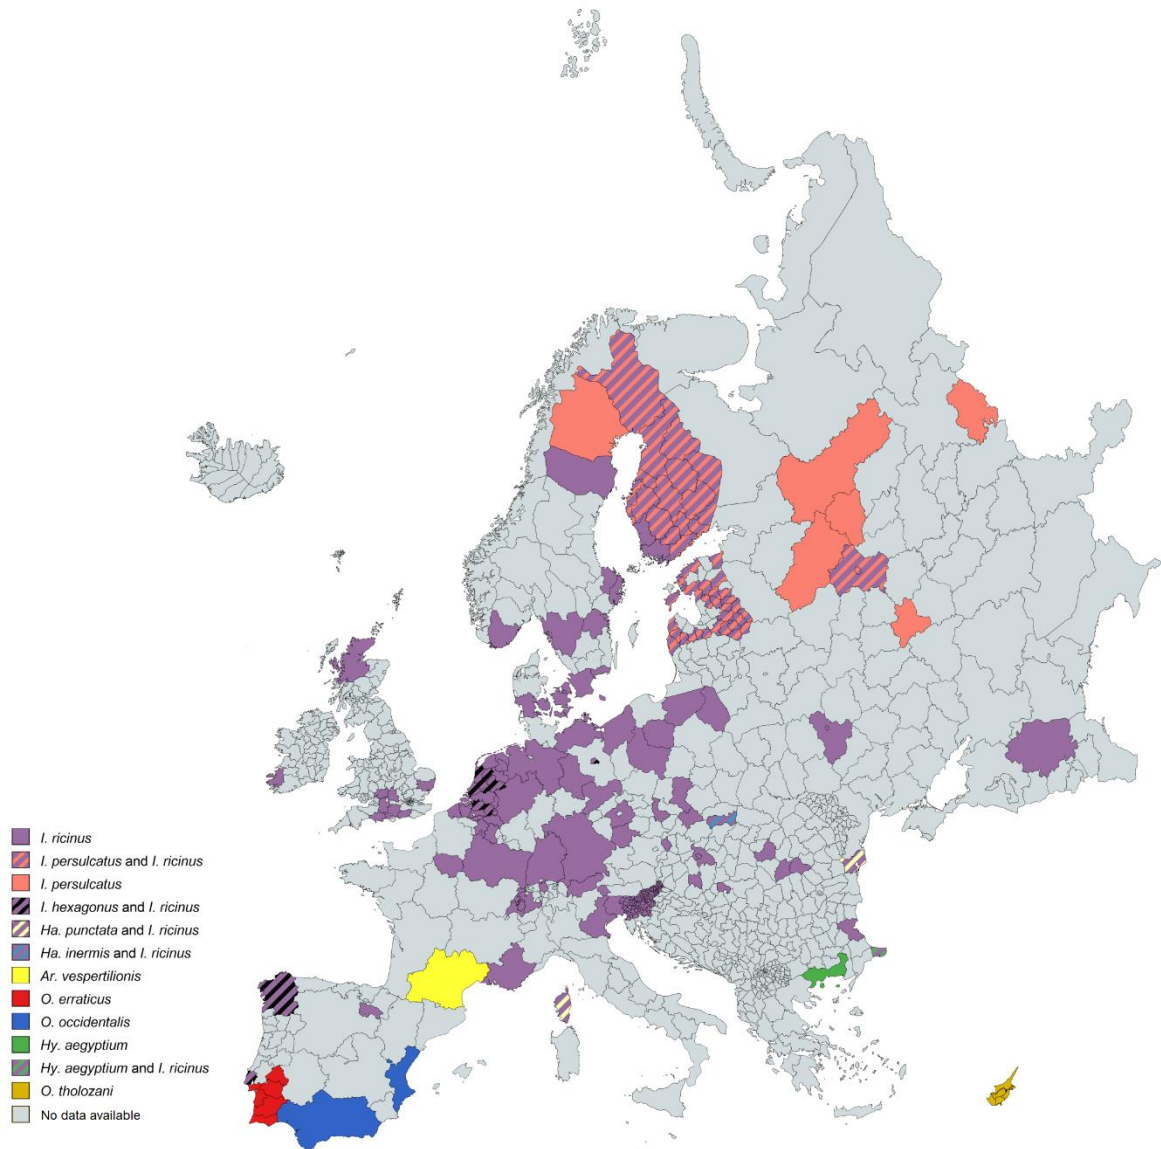

Ar., Argas; Ha., *Haemaphysalis*; Hy., *Hyalomma*; I., *Ixodes*; O., *Ornithodoros*.

Map created on [www.mapchart.net](http://www.mapchart.net).

S1D Fig

Distribution of competent vector ticks for TBRF *Borrelia* in Asia.

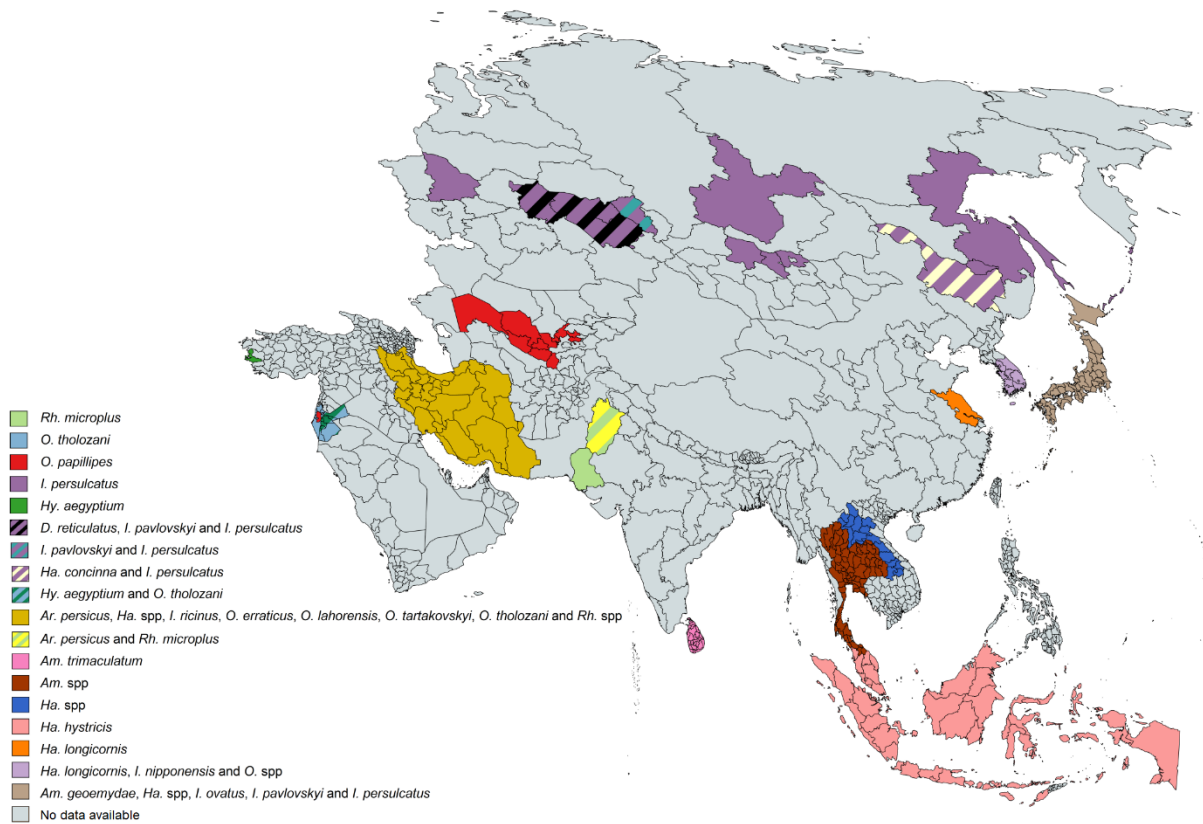

Am., *Amblyomma*; Ar., *Argas*; D., *Dermacentor*; Ha., *Haemaphysalis*; Hy., *Hyalomma*; I., *Ixodes*; O., *Ornithodoros*; Rh., *Rhipicephalus*; spp., species (plural).

Map created on [www.mapchart.net](http://www.mapchart.net).
