# Supplementary material for: Tick borne relapsing fever - a systematic review and analysis of the literature
Source: PubMed Central journal article supplement (PMC8887751; doi:10.1371/journal.pntd.0010212), 2022-02-16
Supplement: pntd.0010212.s010.pdf [file pntd.0010212.s010.pdf]

# Tick borne relapsing fever – a systematic review and analysis of the literature

S2 Fig

Subgroup analysis of *B. crocidurae* and *B. hermsii*.

S2A Fig Reported number of relapsing fever episodes in studies on TBRF caused by *B. crocidurae* or *B. hermsii*.

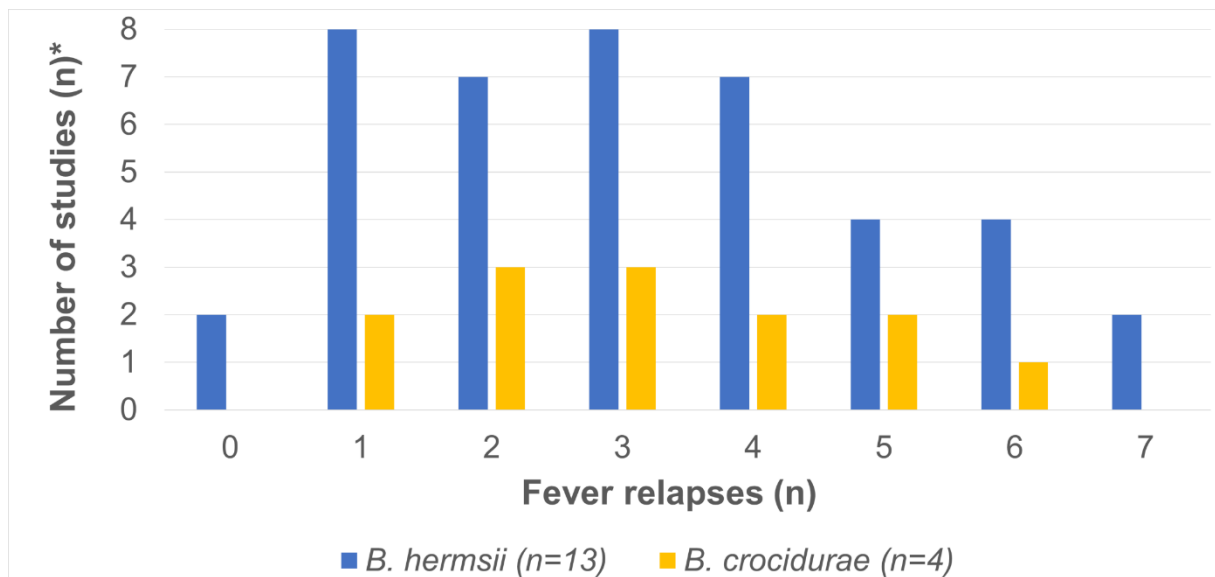

S2B Fig

Reported relative frequency of signs and symptoms (in %) related to *B. crocidurae* and *B. hermsii* TBRF infections.

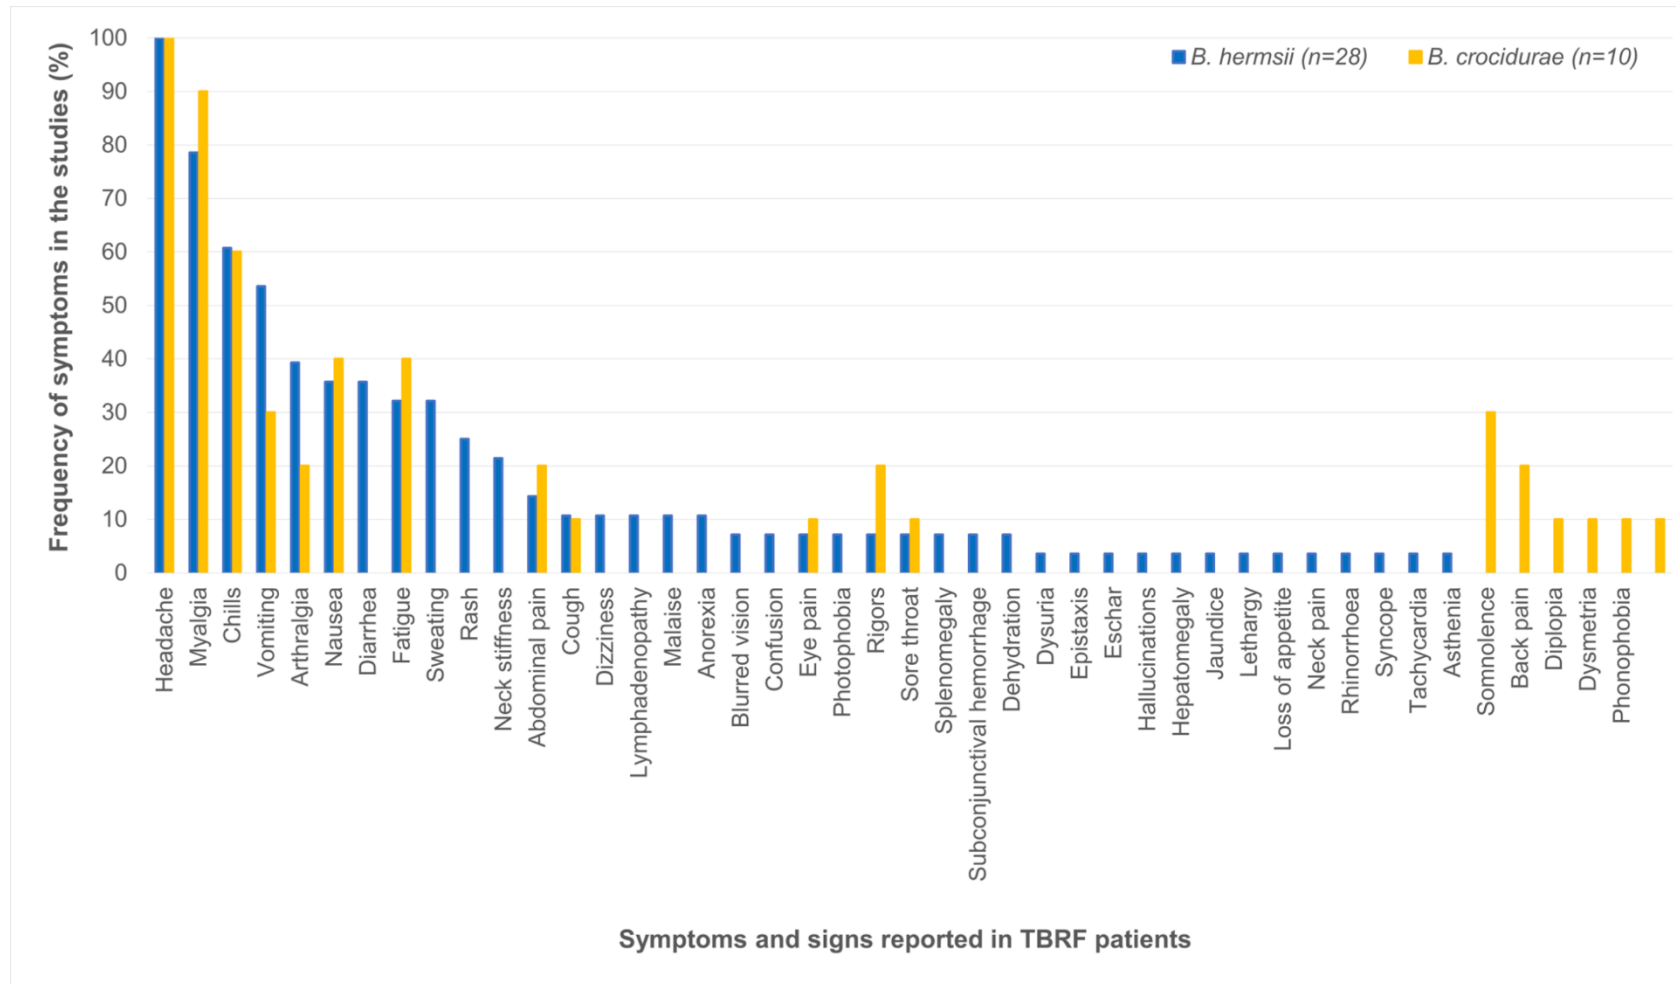

S2C Fig

Complications (in %) related to TBRF cases caused by *B. crocidurae* or *B. hermsii*, as reported by the authors.

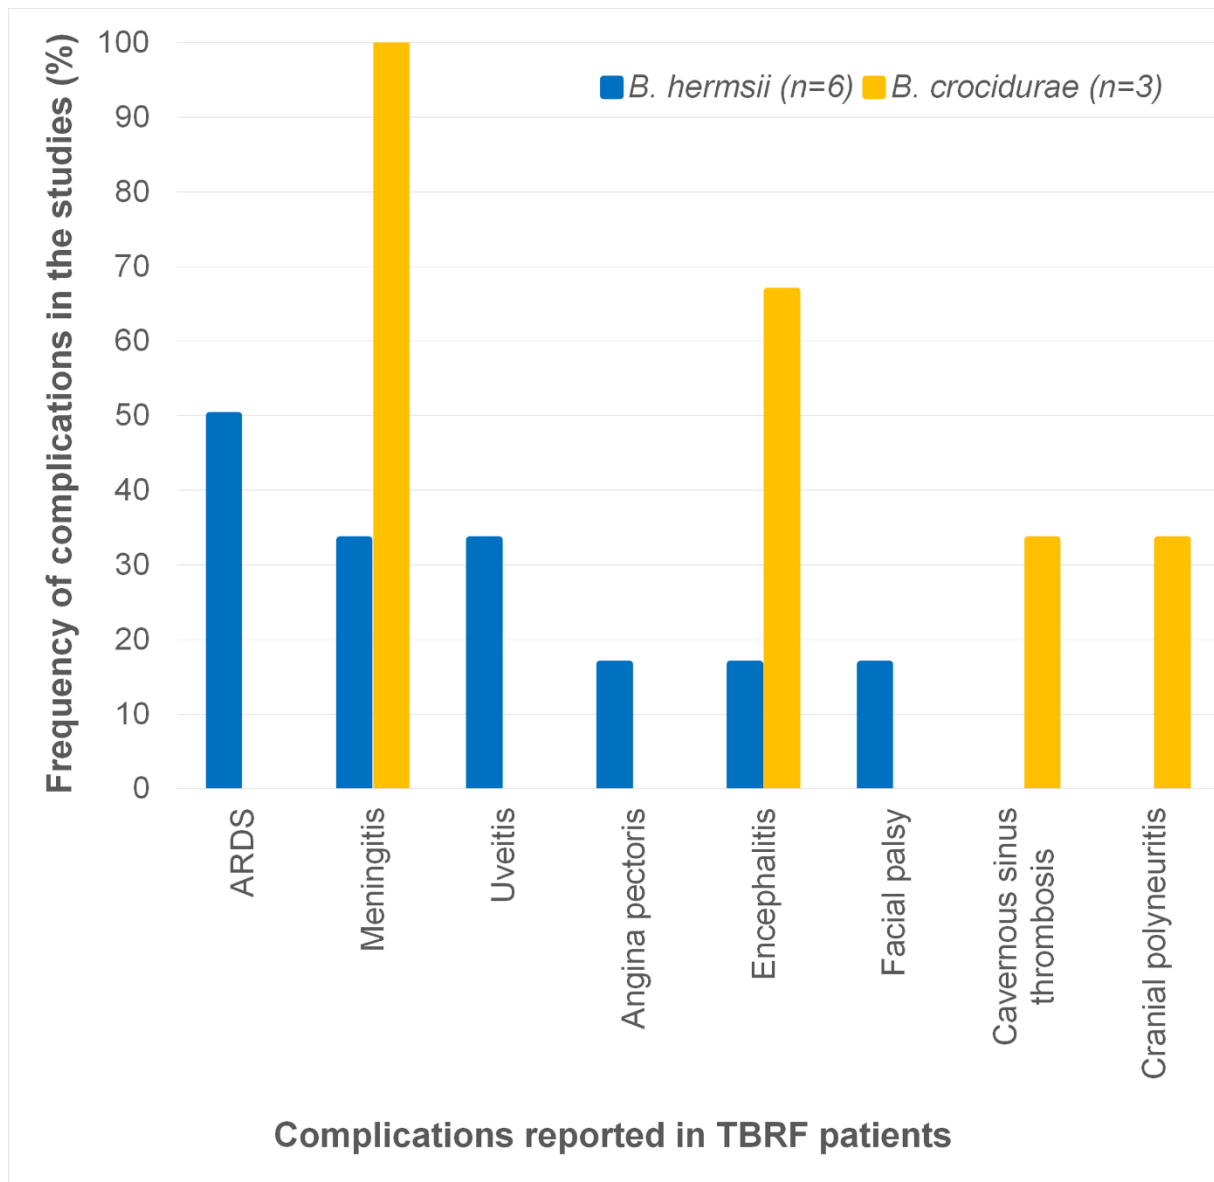

ARDS, acute respiratory distress syndrome.
